# Supplementary material for: Spectroscopic and Colorimetric Studies for Anions with a New Urea-Based Molecular Cleft
Source: MDPI journal article supplement (doi:10.3390/chemosensors9100287), 2021-10-11
Supplement: s1 [file s1]

Article

# Spectroscopic and Colorimetric Studies for Anions with a New Urea-Based Molecular Cleft

Sanchita Kundu, Tochukwu Kevin Egboluche, Zehra Yousuf and Md. Alamgir Hossain \*

Department of Chemistry, Physics and Atmospheric Sciences, Jackson State University, Jackson, MS 29217, USA; sanchita.v23@gmail.com (S.K.); tochukwuKevin1986@gmail.com (T.K.E.); zayousuf9@gmail.com (Z.Y.)

\* Correspondence: alamgir.hossain@jsums.edu

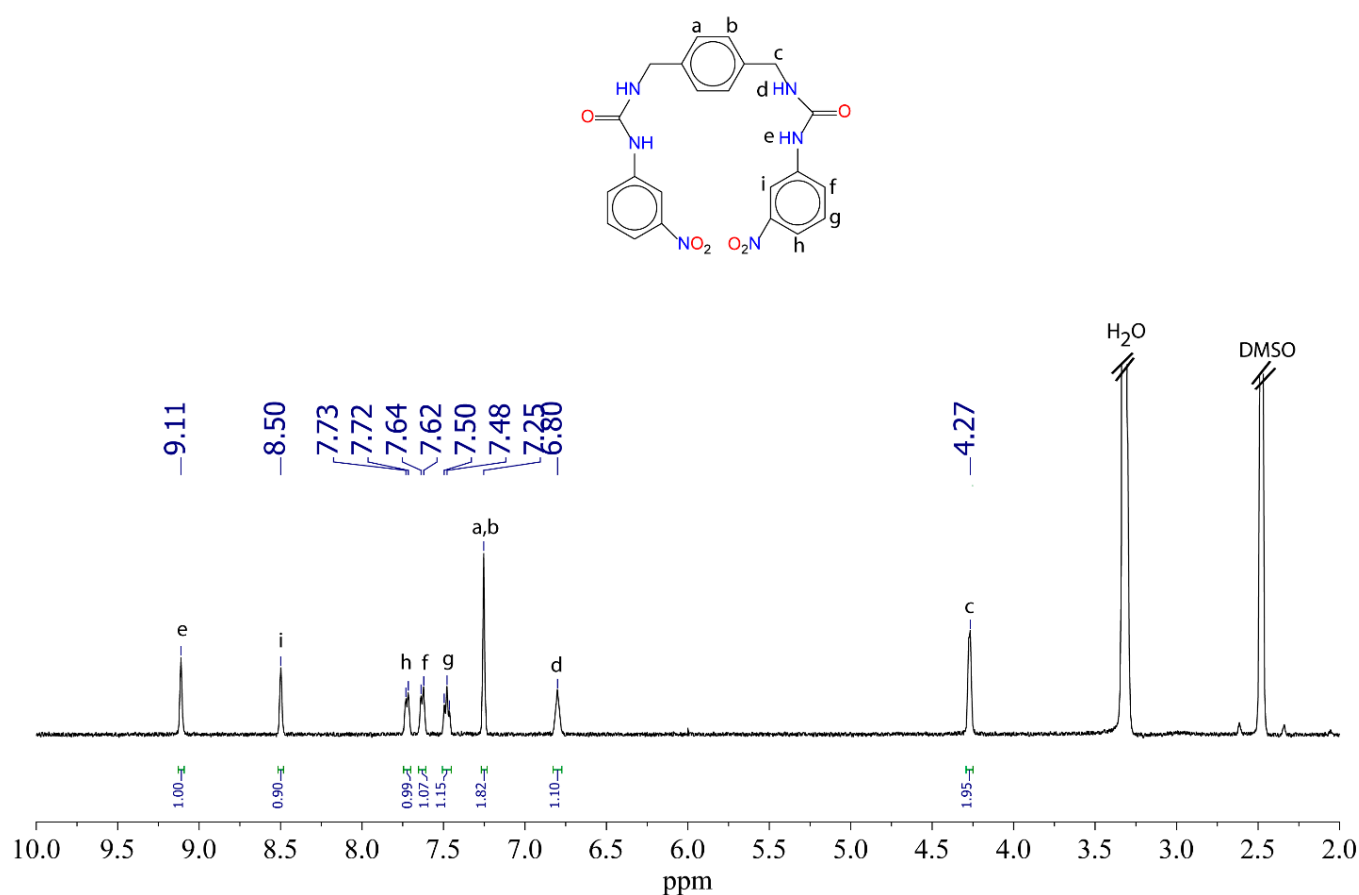

Figure S1.  $^1\text{H}$  NMR characterization of L in  $\text{DMSO-d}_6$ .

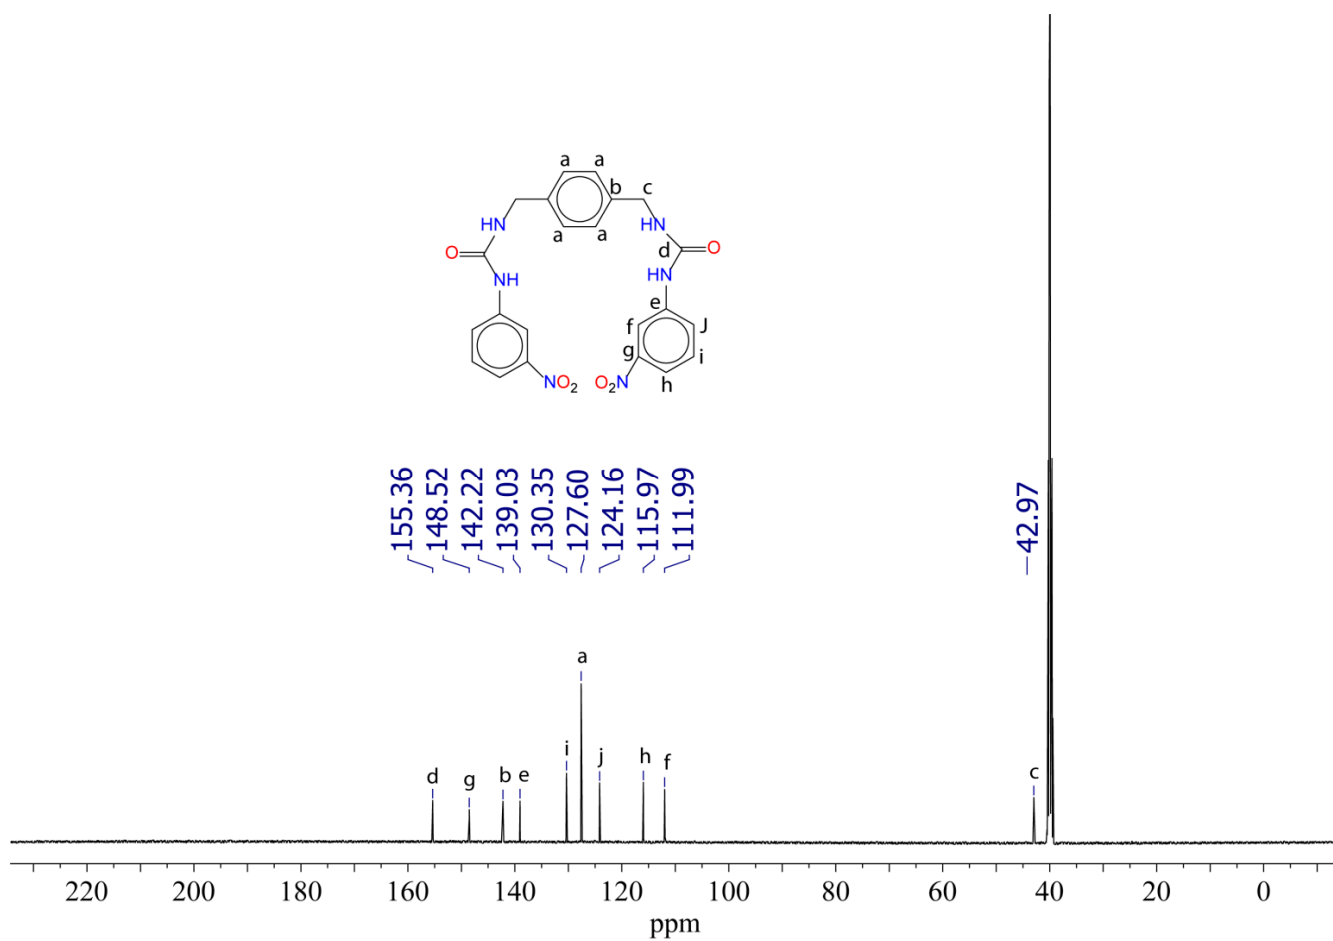

Figure S2.  $^{13}\text{C}$  NMR characterization of **L** in  $\text{DMSO-d}_6$ .

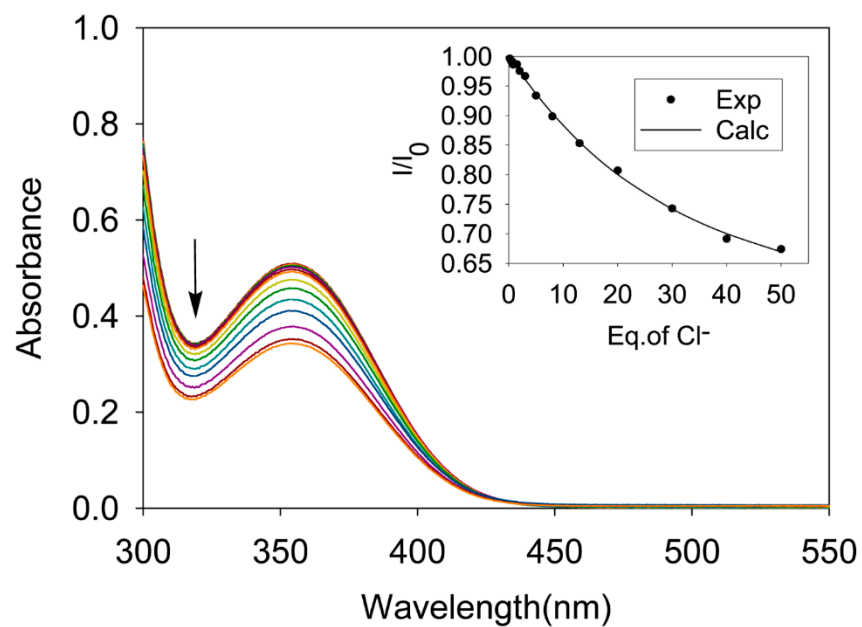

Figure S3. UV-Vis titration of **L** ( $1.25 \times 10^{-4} \text{ M}$ ) with incremental addition of *n*-TBACl in  $\text{DMSO}$ . Binding isotherm is calculated using 1:2 binding model.

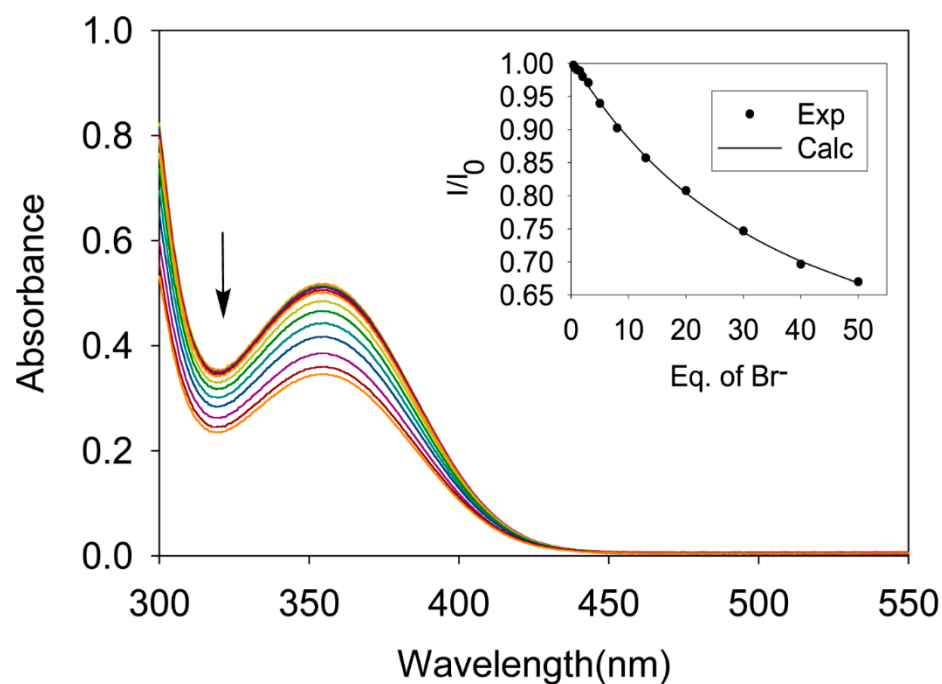

**Figure S4.** UV-Vis titration of **L** ( $1.25 \times 10^{-4} \text{ M}$ ) with incremental addition of *n*-TBABr in DMSO. Binding isotherm is calculated using 1:2 binding model.

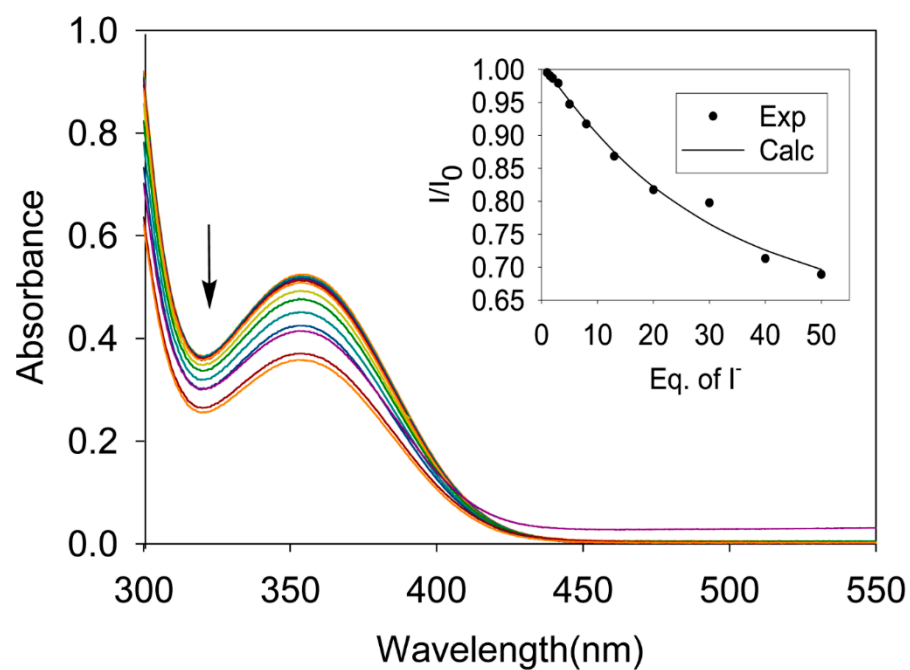

**Figure S5.** UV-Vis titration of **L** ( $1.25 \times 10^{-4} \text{ M}$ ) with incremental addition of *n*-TBAI in DMSO. Binding isotherm is calculated using 1:2 binding model.

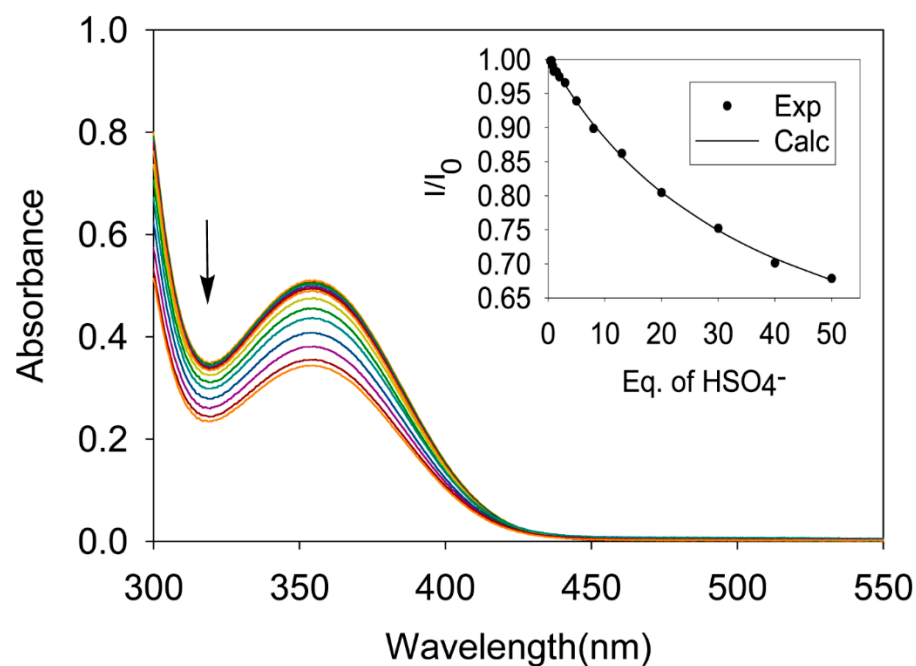

**Figure S6.** UV-Vis titration of L (1.25 × 10<sup>-4</sup> M) with incremental addition of *n*-TBAHSO<sub>4</sub> in DMSO. Binding isotherm is calculated using 1:2 binding model.

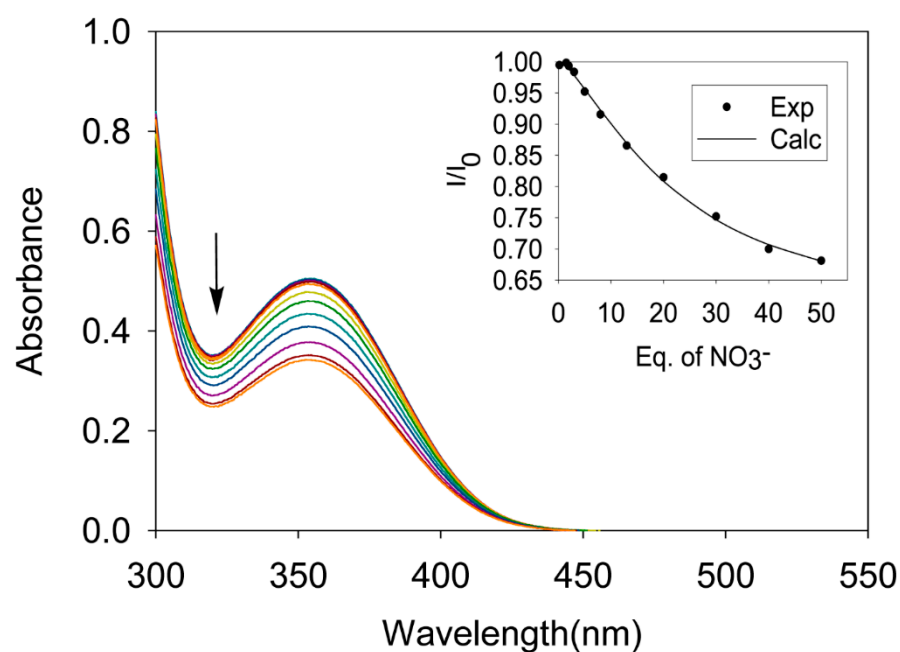

**Figure S7.** UV-Vis titration of L (1.25 × 10<sup>-4</sup> M) with incremental addition of *n*-TBANO<sub>3</sub> in DMSO. Binding isotherm is calculated using 1:2 binding model.

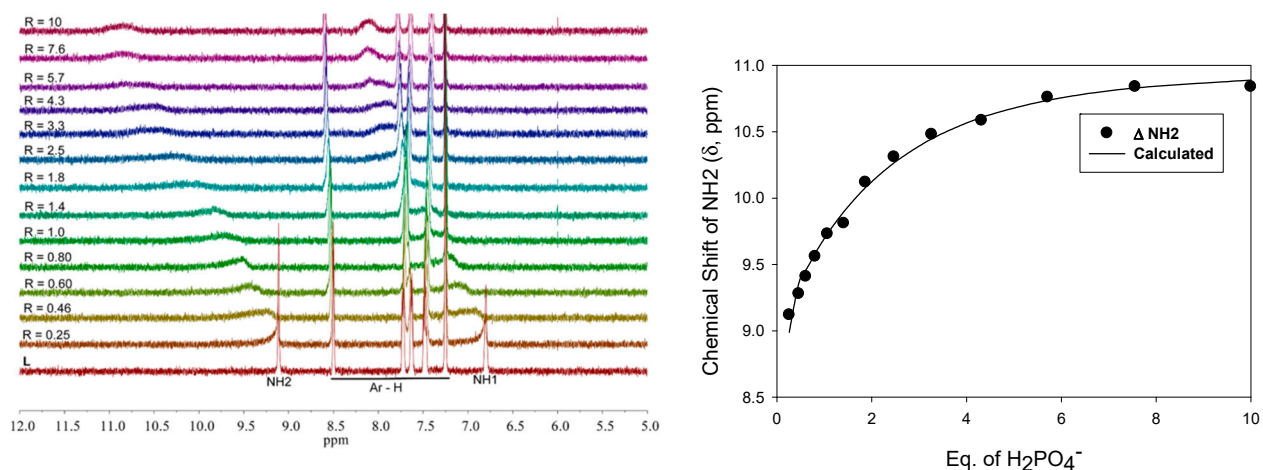

**Figure S8.**  $^1\text{H}$  NMR titration of L (2mM) with incremental addition of  $n\text{-TBAH}_2\text{PO}_4$  in  $\text{DMSO-d}_6$ . Binding isotherm is calculated using 1:2 binding model.

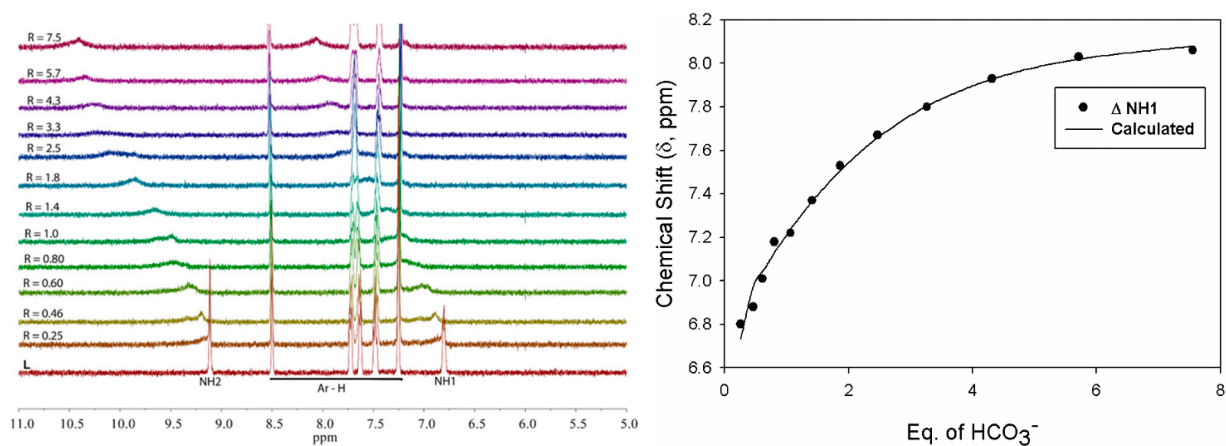

**Figure S9.**  $^1\text{H}$  NMR titration of L (2mM) with incremental addition of  $\text{TEAHCO}_3$  in  $\text{DMSO-d}_6$ . Binding isotherm is calculated using 1:2 binding model.

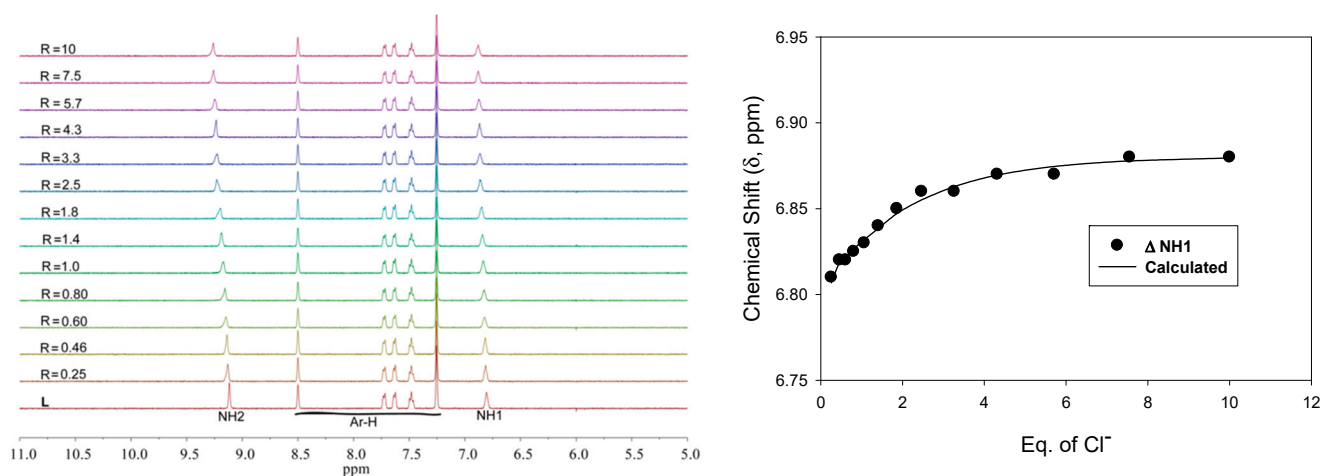

**Figure S10.**  $^1\text{H}$  NMR titration of L (2mM) with incremental addition of  $n\text{-TBACl}$  in  $\text{DMSO-d}_6$ . Binding isotherm is calculated using 1:2 binding model.

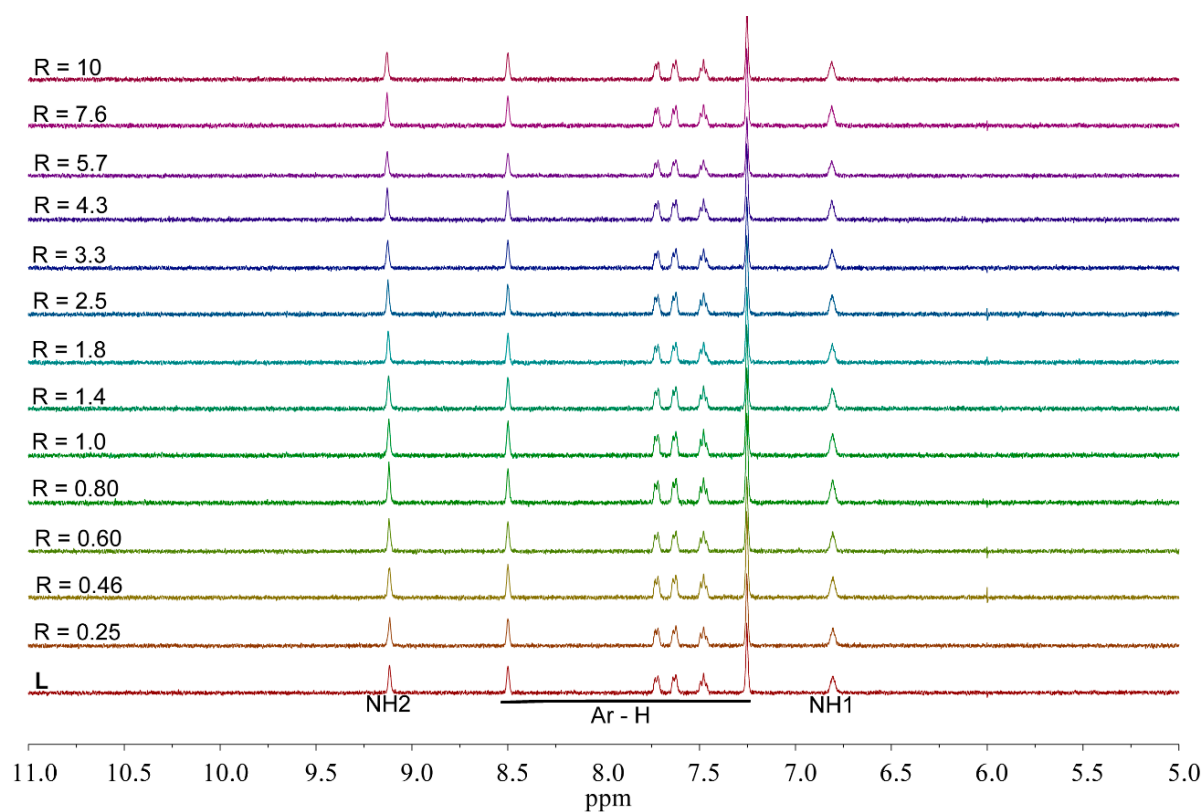

**Figure S11.**  $^1\text{H}$  NMR titration of L (2mM) with incremental addition of *n*-TBABr in  $\text{DMSO-d}_6$ .

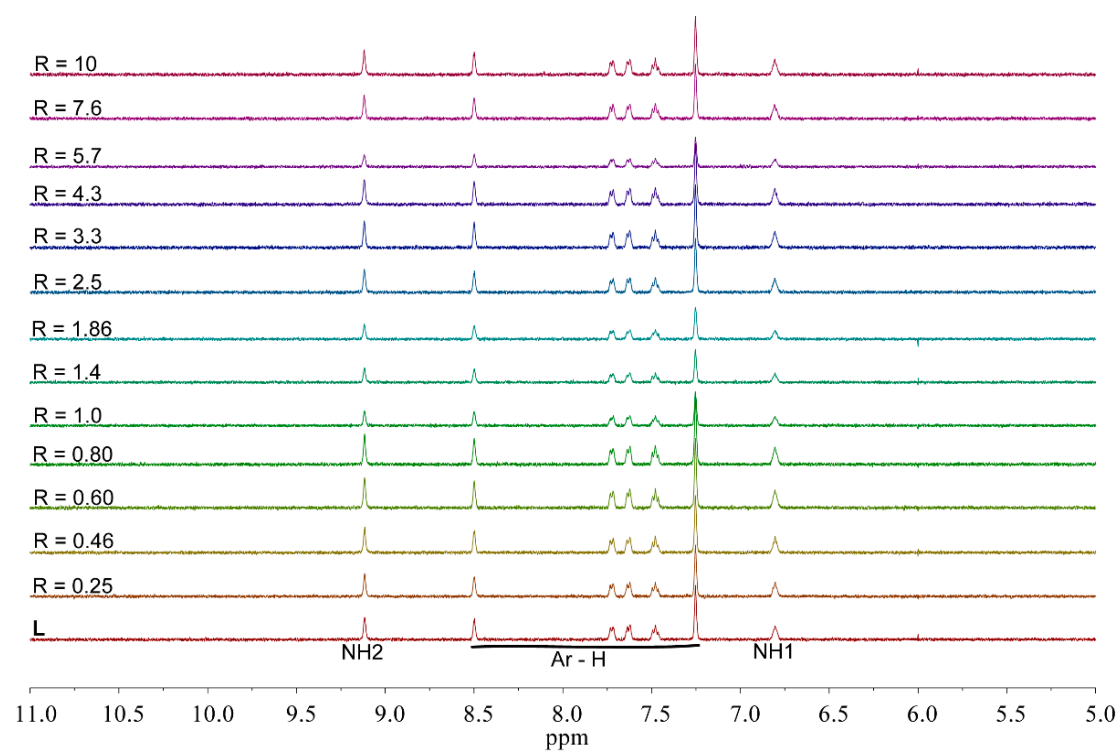

**Figure S12.**  $^1\text{H}$  NMR titration of L (2mM) with incremental addition of *n*-TBAI in  $\text{DMSO-d}_6$ .

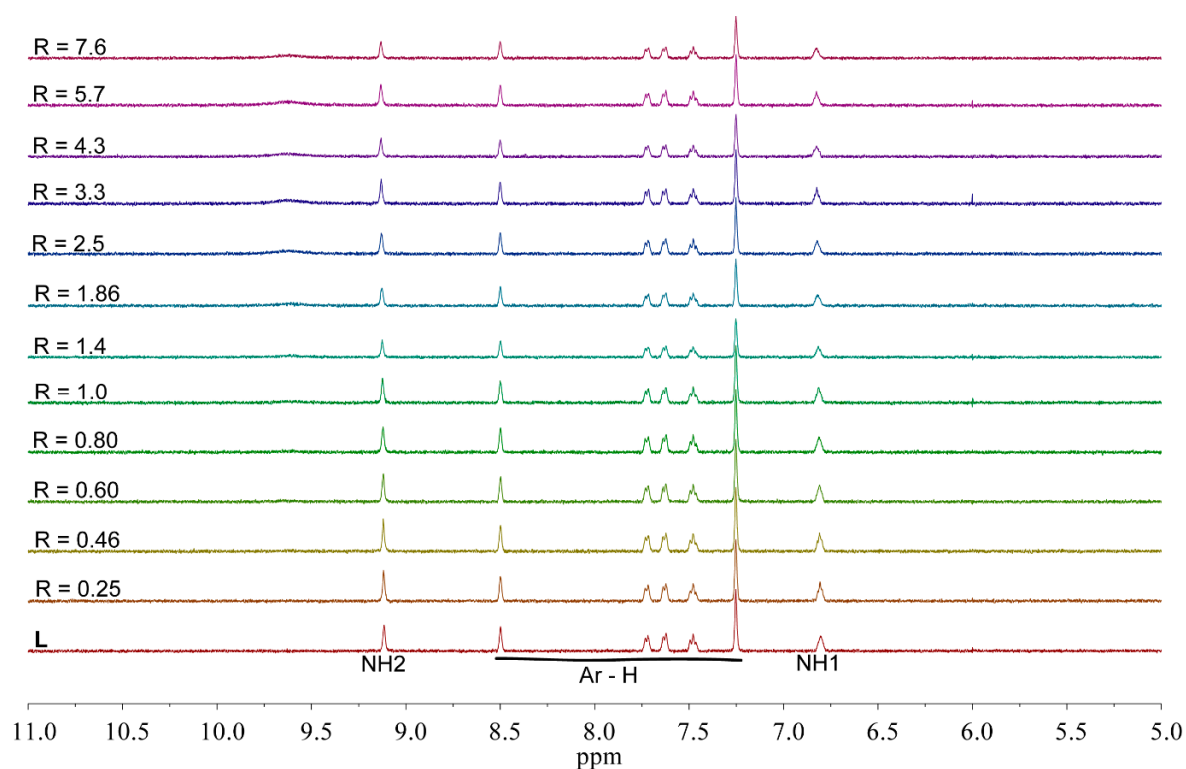

**Figure S13.**  $^1\text{H}$  NMR titration of **L** (2mM) with incremental addition of *n*-TBAHSO<sub>4</sub> in DMSO-*d*<sub>6</sub>.

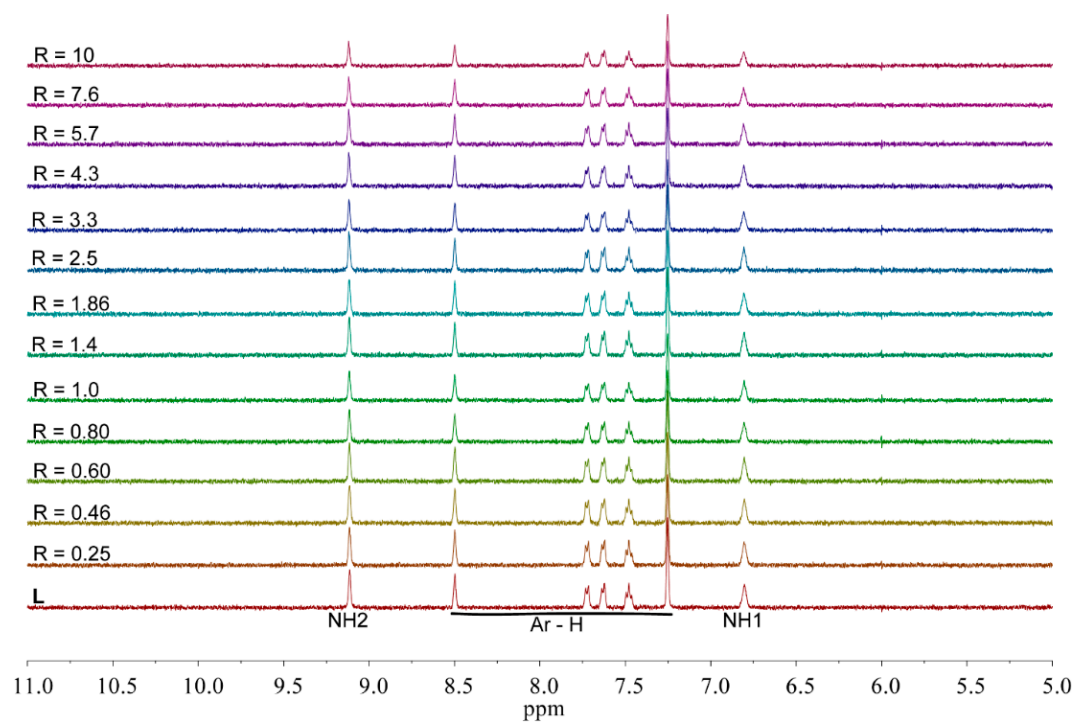

**Figure S14.**  $^1\text{H}$  NMR titration of **L** (2mM) with incremental addition of *n*-TBANO<sub>3</sub> in DMSO-*d*<sub>6</sub>.
